# Supplementary material for: Effect of Oral Semaglutide on the Pharmacokinetics of Lisinopril, Warfarin, Digoxin, and Metformin in Healthy Subjects
Source: Springer Nature journal article supplement (doi:10.1007/s40262-019-00756-2), 2019-04-04
Supplement: MOESM1 [file 16609738]

**Supplementary material**

**Article title:** Effect of Oral Semaglutide on the Pharmacokinetics of Lisinopril, Warfarin, Digoxin, and Metformin in Healthy Subjects

**Journal name:** *Clinical Pharmacokinetics*

**Author names:** Tine A. Bækdal, Jeanett Borregaard, Cilie W. Hansen, Mette Thomsen, Thomas W. Anderson

**Corresponding author details:** Tine A. Bækdal: Novo Nordisk A/S, Vandtårnsvej 108–110, 2860 Søborg, Denmark. Email: tabq@novonordisk.com

**Supplementary table 1** Sampling time points

| Treatments         | Sampling schedule (h) |       |      |     |      |   |     |   |     |   |   |   |   |   |    |    |    |    |    |    |    |
|--------------------|-----------------------|-------|------|-----|------|---|-----|---|-----|---|---|---|---|---|----|----|----|----|----|----|----|
|                    | 0                     | 5 min | 0.25 | 0.5 | 0.75 | 1 | 1.5 | 2 | 2.5 | 3 | 4 | 5 | 6 | 8 | 10 | 12 | 14 | 16 | 20 | 24 | 30 |
| <b>Trial 1</b>     |                       |       |      |     |      |   |     |   |     |   |   |   |   |   |    |    |    |    |    |    |    |
| <b>Lisinopril</b>  | x                     |       |      |     |      |   |     | x |     |   | x |   | x | x | x  | x  | x  |    |    |    | x  |
| <b>Warfarin</b>    | x                     |       |      | x   |      | x |     | x |     | x | x | x | x | x |    | x  |    |    |    |    | x  |
| <b>Semaglutide</b> | x                     |       |      | x   |      | x | x   | x |     | x | x |   | x |   |    | x  |    |    |    |    | x  |
| <b>SNAC</b>        | x                     |       | x    | x   | x    | x | x   | x |     |   | x |   | x |   |    | x  |    |    |    |    | x  |
| <b>Trial 2</b>     |                       |       |      |     |      |   |     |   |     |   |   |   |   |   |    |    |    |    |    |    |    |
| <b>Digoxin</b>     | x                     |       |      | x   |      | x | x   | x | x   | x | x |   | x | x |    | x  |    |    | x  |    | x  |
| <b>Metformin</b>   | x                     |       |      | x   | x    | x | x   | x | x   | x | x | x | x | x | x  | x  | x  | x  | x  | x  | x  |
| <b>Semaglutide</b> | x                     |       |      | x   |      | x | x   | x | x   | x | x |   | x |   |    | x  |    |    |    |    | x  |
| <b>SNAC</b>        | x                     | x     | x    | x   | x    | x | x   | x |     |   | x |   | x |   |    | x  |    |    |    |    | x  |

| Treatments         | Sampling schedule (h) |                |    |    |                |     |                  |     |                |                |                |
|--------------------|-----------------------|----------------|----|----|----------------|-----|------------------|-----|----------------|----------------|----------------|
|                    | 36                    | 48             | 60 | 72 | 96             | 120 | 144              | 168 | 312            | 504            | 744-840        |
| <b>Trial 1</b>     |                       |                |    |    |                |     |                  |     |                |                |                |
| <b>Lisinopril</b>  | x                     | x              | x  |    |                |     |                  |     |                |                |                |
| <b>Warfarin</b>    | x                     | x              |    | x  | x              | x   | x                | x   |                |                |                |
| <b>Semaglutide</b> | x <sup>a</sup>        | x <sup>a</sup> |    |    | x <sup>a</sup> |     | x <sup>a,b</sup> |     | x <sup>a</sup> | x <sup>a</sup> |                |
| <b>SNAC</b>        |                       |                |    |    |                |     | x <sup>b</sup>   |     |                |                |                |
| <b>Trial 2</b>     |                       |                |    |    |                |     |                  |     |                |                |                |
| <b>Digoxin</b>     |                       | x              |    | x  | x              | x   |                  |     |                |                |                |
| <b>Metformin</b>   |                       |                |    |    |                |     |                  |     |                |                |                |
| <b>Semaglutide</b> | x <sup>a</sup>        | x <sup>a</sup> |    |    | x <sup>a</sup> |     | x <sup>a</sup>   |     | x <sup>a</sup> | x <sup>a</sup> | x <sup>a</sup> |
| <b>SNAC</b>        |                       |                |    |    |                |     |                  |     |                |                |                |

<sup>a</sup>Sampling at these time points only when oral semaglutide was given alone; <sup>b</sup>Sampling at 144 h only when given with warfarin

SNAC sodium N-(8-[2-hydroxybenzoyl] amino) caprylate

**Supplementary table 2** Pharmacokinetic endpoints either alone or after co-administration with oral semaglutide or SNAC

**a. Lisinopril (single dose)**

| <b>Parameters</b>                   | <b>Lisinopril alone<br/>(N = 52)</b> | <b>Lisinopril + oral<br/>semaglutide<br/>(N = 46)</b> | <b>Lisinopril + SNAC<br/>(N = 50)</b> |
|-------------------------------------|--------------------------------------|-------------------------------------------------------|---------------------------------------|
| <b>AUC<sub>0-60h</sub>, ng·h/mL</b> | 930.01 (33.27)                       | 983.10 (45.15)                                        | 863.91 (40.53)                        |
| <b>C<sub>max</sub>, ng/mL</b>       | 62.61 (38.23)                        | 59.74 (49.59)                                         | 55.38 (49.63)                         |
| <b>t<sub>max</sub>, h</b>           | 6.0 (4.0, 8.0)                       | 6.0 (4.0, 14.0)                                       | 6.0 (4.0, 10.0)                       |
| <b>t<sub>1/2</sub>, h</b>           | 20 (30)                              | 18 (28)                                               | 22 (29)                               |

**b. S-warfarin (single dose)**

| <b>Parameters</b>                    | <b>S-warfarin alone<br/>(N = 50)</b> | <b>S-warfarin + oral<br/>semaglutide<br/>(N = 46)</b> | <b>S-warfarin + SNAC<br/>(N = 49)</b> |
|--------------------------------------|--------------------------------------|-------------------------------------------------------|---------------------------------------|
| <b>AUC<sub>0-168h</sub>, ng·h/mL</b> | 53454.44 (34.38)                     | 57340.45 (39.57)                                      | 36590.44 (108.27)                     |
| <b>C<sub>max</sub>, ng/mL</b>        | 1518.47 (25.50)                      | 1339.37 (34.50)                                       | 943.51 (85.46)                        |
| <b>t<sub>max</sub>, h</b>            | 1.0 (0.5, 7.9)                       | 1.0 (0.5, 23.9)                                       | 1.0 (0.5, 35.2)                       |
| <b>t<sub>1/2</sub>, h</b>            | 38 (27)                              | 38 (27)                                               | 42 (28)                               |

**c. Digoxin (single dose)**

| <b>Parameters</b>                    | <b>Digoxin alone<br/>(N = 31)</b> | <b>Digoxin + oral<br/>semaglutide<br/>(N = 31)</b> | <b>Digoxin alone<br/>(N = 32)</b> | <b>Digoxin + SNAC<br/>(N = 32)</b> |
|--------------------------------------|-----------------------------------|----------------------------------------------------|-----------------------------------|------------------------------------|
| <b>AUC<sub>0-120h</sub>, ng·h/mL</b> | 32.42 (26.1)                      | 33.30 (34.9)                                       | 32.58 (25.8)                      | 30.69 (26.1)                       |
| <b>C<sub>max</sub>, ng/mL</b>        | 3.11 (33.4)                       | 3.06 (36.2)                                        | 3.12 (32.9)                       | 2.57 (35.1)                        |
| <b>t<sub>max</sub>, h</b>            | 1.0 (0.5, 1.0)                    | 1.0 (0.5, 1.6)                                     | 1.0 (0.5, 1.0)                    | 1.0 (0.5, 1.1)                     |
| <b>t<sub>1/2</sub>, h</b>            | 42 (11)                           | 43 (13)                                            | 42 (11)                           | 45 (13)                            |

d. Metformin (steady state)

| Parameters                          | Metformin alone<br>(N = 31) | Metformin + oral<br>semaglutide<br>(N = 31) | Metformin alone<br>(N = 32) | Metformin +<br>SNAC<br>(N=32) |
|-------------------------------------|-----------------------------|---------------------------------------------|-----------------------------|-------------------------------|
| <b>AUC<sub>0-inf</sub>, ng·h/mL</b> | 7873 (23.4)                 | 10430 (26.5)                                | 7895 (23.1)                 | 8326 (27.3)                   |
| <b>C<sub>max</sub>, ng/mL</b>       | 1690 (18.5)                 | 1654 (32.5)                                 | 1683 (18.3)                 | 1777 (27.2)                   |
| <b>t<sub>max</sub>, h</b>           | 0.8 (0.5, 1.5)              | 1.0 (0.5, 6.0)                              | 0.8 (0.5, 1.5)              | 0.8 (0.5, 1.5)                |
| <b>t<sub>1/2</sub>, h</b>           | 16 (58)                     | 13 (72)                                     | 16 (57)                     | 14 (52)                       |

Data are geometric means (coefficient of variation) except for t<sub>max</sub> where median (minimum, maximum) values are presented

*AUC<sub>0-60h</sub>* area under the concentration–time curve from time 0 to 60 h, *AUC<sub>0-120h</sub>* area under the concentration–time curve from time 0 to 120 h, *AUC<sub>0-168h</sub>* area under the concentration–time curve from time 0 to 168 h, *AUC<sub>0-inf</sub>* area under the concentration–time curve from time 0 to infinity, *C<sub>max</sub>* maximum concentration, *SNAC* sodium N-(8-[2-hydroxybenzoyl] amino) caprylate, *t<sub>1/2</sub>* terminal half-life, *t<sub>max</sub>* time to reach maximum concentration

**Supplementary table 3** Pharmacokinetic endpoints for SNAC

**a. Trial 1**

|                                                   | <b>Lisinopril +<br/>SNAC alone</b> | <b>Warfarin +<br/>SNAC alone</b> | <b>Lisinopril +<br/>oral<br/>semaglutide</b> | <b>Warfarin +<br/>oral<br/>semaglutide</b> | <b>Oral<br/>semaglutide<br/>only</b> |
|---------------------------------------------------|------------------------------------|----------------------------------|----------------------------------------------|--------------------------------------------|--------------------------------------|
| <b>AUC<sub>0-24h</sub>, ng·h/mL, single dose</b>  | 1154 (410)                         | 1150 (385)                       | –                                            | –                                          | –                                    |
| <b>AUC<sub>0-24h</sub>, ng·h/mL, steady state</b> | –                                  | –                                | 1333 (590)                                   | 1369 (510)                                 | 1466 (596)                           |
| <b>C<sub>max</sub>, ng/mL, single dose</b>        | 1519 (754)                         | 1536 (825)                       | –                                            | –                                          | –                                    |
| <b>C<sub>max</sub>, ng/mL, steady state</b>       | –                                  | –                                | 1448 (1029)                                  | 1460 (728)                                 | 1834 (1628)                          |
| <b>t<sub>max</sub>, h, single dose</b>            | 0.5 (0.2, 1.0)                     | 0.5 (0.2, 1.5)                   | –                                            | –                                          | –                                    |
| <b>t<sub>max</sub>, h, steady state</b>           | –                                  | –                                | 0.8 (0.2, 4.0)                               | 0.6 (0.2, 4.0)                             | 0.7 (0.2, 1.5)                       |

Data are mean (standard deviation) except for t<sub>max</sub> where median (minimum, maximum) values are presented

**b. Trial 2**

|                                                    | <b>Digoxin +<br/>SNAC alone</b> | <b>Metformin +<br/>SNAC alone</b> | <b>Digoxin +<br/>oral<br/>semaglutide</b> | <b>Metformin +<br/>oral<br/>semaglutide</b> | <b>Oral<br/>semaglutide<br/>only</b> |
|----------------------------------------------------|---------------------------------|-----------------------------------|-------------------------------------------|---------------------------------------------|--------------------------------------|
| <b>AUC<sub>0-24h</sub>, ng·h/mL, single dose</b>   | 1063 (29)                       | –                                 | –                                         | –                                           | –                                    |
| <b>AUC<sub>0-24h</sub>, ng·h/mL, 4 daily doses</b> | –                               | 1147 (26)                         | –                                         | –                                           | –                                    |
| <b>AUC<sub>0-24h</sub>, ng·h/mL, steady state</b>  | –                               | –                                 | 1331 (28)                                 | 1323 (28)                                   | 1320 (25)                            |
| <b>C<sub>max</sub>, ng/mL, single dose</b>         | 1318 (42)                       | –                                 | –                                         | –                                           | –                                    |

|                                              |                |                |                |                |                |
|----------------------------------------------|----------------|----------------|----------------|----------------|----------------|
| <b>C<sub>max</sub>, ng/mL, 4 daily doses</b> | –              | 1390 (46)      | –              | –              | –              |
| <b>C<sub>max</sub>, ng/mL, steady state</b>  | –              | –              | 1163 (87)      | 1063 (81)      | 1157 (72)      |
| <b>t<sub>max</sub>, h, single dose</b>       | 0.5 (0.3, 1.0) | –              | –              | –              | –              |
| <b>t<sub>max</sub>, h, 4 daily doses</b>     | –              | 0.4 (0.2, 1.5) | –              | –              | –              |
| <b>t<sub>max</sub>, h, steady state</b>      | –              | –              | 0.8 (0.3, 1.0) | 0.5 (0.1, 6.0) | 0.7 (0.2, 6.0) |

Data are geometric means (coefficient of variation) except for t<sub>max</sub> where median (minimum, maximum) values are presented

*AUC*<sub>0–24h</sub> area under the concentration–time curve from time 0 to 24 h, *C*<sub>max</sub> maximum concentration, *SNAC* sodium N-(8-[2-hydroxybenzoyl] amino) caprylate, *t*<sub>max</sub> time to reach maximum concentration

**Supplementary table 4** Overview of treatment-emergent adverse events in healthy subjects by treatment

a. Trial 1

|                                                                   | <b>Lisinopril<br/>n (%) E</b> | <b>Warfarin<br/>n (%) E</b> | <b>Lisinopril +<br/>SNAC<br/>n (%) E</b> | <b>Warfarin +<br/>SNAC<br/>n (%) E</b> | <b>Lisinopril +<br/>oral<br/>semaglutide<br/>n (%) E</b> | <b>Warfarin +<br/>oral<br/>semaglutide<br/>n (%) E</b> | <b>Oral<br/>semaglutide<br/>only<br/>n (%) E</b> | <b>Oral<br/>semaglutide<br/>total<br/>n (%) E</b> | <b>Total<br/>n (%) E</b> |
|-------------------------------------------------------------------|-------------------------------|-----------------------------|------------------------------------------|----------------------------------------|----------------------------------------------------------|--------------------------------------------------------|--------------------------------------------------|---------------------------------------------------|--------------------------|
| <b>Number of subjects</b>                                         | 52                            | 50                          | 50                                       | 49                                     | 46                                                       | 46                                                     | 49                                               | 49                                                | 52                       |
| <b>Adverse events</b>                                             | 9 (17.3) 15                   | 6 (12.0) 7                  | 10 (20.0) 15                             | 19 (38.8) 29                           | 18 (39.1) 46                                             | 10 (21.7) 19                                           | 34 (69.4) 163                                    | 36 (73.5) 228                                     | 44 (84.6) 294            |
| <b>Serious adverse events</b>                                     | 0                             | 0                           | 0                                        | 0                                      | 0                                                        | 0                                                      | 0                                                | 0                                                 | 0                        |
| <b>Adverse events leading to withdrawal</b>                       | 1 (1.9) 1                     | 0                           | 1 (2.0) 1                                | 0                                      | 0                                                        | 0                                                      | 1 (2.0) 1                                        | 1 (2.0) 1                                         | 3 (5.8) 3                |
| <b>Adverse events by organ class</b>                              |                               |                             |                                          |                                        |                                                          |                                                        |                                                  |                                                   |                          |
| <b>Gastrointestinal disorders</b>                                 | 3 (5.8) 4                     | 0                           | 6 (12.0) 8                               | 4 (8.2) 7                              | 11 (23.9) 24                                             | 6 (13.0) 11                                            | 27 (55.1) 102                                    | 29 (59.2) 137                                     | 33 (63.5) 156            |
| <b>Nervous system disorders</b>                                   | 3 (5.8) 4                     | 3 (6.0) 3                   | 2 (4.0) 2                                | 3 (6.1) 3                              | 9 (19.6) 10                                              | 4 (8.7) 4                                              | 9 (18.4) 13                                      | 17 (34.7) 27                                      | 22 (42.3) 39             |
| <b>General disorders &amp; administration<br/>site conditions</b> | 2 (3.8) 2                     | 1 (2.0) 1                   | 1 (2.0) 1                                | 3 (6.1) 3                              | 5 (10.9) 5                                               | 1 (2.2) 1                                              | 14 (28.6) 23                                     | 19 (38.8) 29                                      | 22 (42.3) 36             |
| <b>Metabolism &amp; nutrition disorders</b>                       | 0                             | 1 (2.0) 1                   | 0                                        | 1 (2.0) 1                              | 2 (4.3) 2                                                | 1 (2.2) 1                                              | 13 (26.5) 15                                     | 14 (28.6) 18                                      | 14 (26.9) 20             |
| <b>Injury, poisoning &amp; procedural<br/>complications</b>       | 0                             | 0                           | 1 (2.0) 1                                | 12 (24.5) 12                           | 0                                                        | 0                                                      | 2 (4.1) 2                                        | 2 (4.1) 2                                         | 15 (28.8) 15             |
| <b>Respiratory, thoracic &amp; mediastinal<br/>disorders</b>      | 2 (3.8) 2                     | 2 (4.0) 2                   | 1 (2.0) 1                                | 0                                      | 1 (2.2) 1                                                | 1 (2.2) 1                                              | 0                                                | 2 (4.1) 2                                         | 7 (13.5) 7               |
| <b>Infections &amp; infestation</b>                               | 1 (1.9) 1                     | 0                           | 1 (2.0) 1                                | 1 (2.0) 1                              | 0                                                        | 0                                                      | 2 (4.1) 2                                        | 2 (4.1) 2                                         | 5 (9.6) 5                |
| <b>Musculoskeletal &amp; connective tissue</b>                    | 1 (1.9) 1                     | 0                           | 0                                        | 0                                      | 1 (2.2) 1                                                | 0                                                      | 2 (4.1) 2                                        | 2 (4.1) 3                                         | 2 (3.8) 4                |

**disorders**

|                      |           |   |   |           |           |   |   |           |           |
|----------------------|-----------|---|---|-----------|-----------|---|---|-----------|-----------|
| <b>Eye disorders</b> | 1 (1.9) 1 | 0 | 0 | 1 (2.0) 1 | 1 (2.1) 1 | 0 | 0 | 1 (2.0) 1 | 2 (3.8) 3 |
|----------------------|-----------|---|---|-----------|-----------|---|---|-----------|-----------|

**b. Trial 2**

|                                                               | <b>Digoxin<br/>n (%) E</b> | <b>Metformin<br/>n (%) E</b> | <b>Digoxin +<br/>SNAC<br/>n (%) E</b> | <b>Metformin +<br/>SNAC<br/>n (%) E</b> | <b>Digoxin +<br/>oral<br/>semaglutide<br/>n (%) E</b> | <b>Metformin +<br/>oral<br/>semaglutide<br/>n (%) E</b> | <b>Oral<br/>semaglutide<br/>only<br/>n (%) E</b> | <b>Oral<br/>semaglutide<br/>total<br/>n (%) E</b> | <b>Total<br/>n (%) E</b> |
|---------------------------------------------------------------|----------------------------|------------------------------|---------------------------------------|-----------------------------------------|-------------------------------------------------------|---------------------------------------------------------|--------------------------------------------------|---------------------------------------------------|--------------------------|
| <b>Number of subjects</b>                                     | 32                         | 32                           | 32                                    | 32                                      | 31                                                    | 31                                                      | 32                                               | 32                                                | 32                       |
| <b>Adverse events</b>                                         | 3 (9.4) 4                  | 6 (18.8) 7                   | 6 (18.8) 9                            | 8 (25.0) 10                             | 8 (25.8) 12                                           | 18 (58.1) 36                                            | 23 (71.9) 103                                    | 27 (84.4) 151                                     | 28 (87.5) 181            |
| <b>Serious adverse events</b>                                 | 0                          | 0                            | 0                                     | 0                                       | 0                                                     | 0                                                       | 0                                                | 0                                                 | 0                        |
| <b>Adverse events leading to withdrawal</b>                   | 0                          | 0                            | 0                                     | 0                                       | 0                                                     | 0                                                       | 1 (3.1) 4                                        | 1 (3.1) 4                                         | 1 (3.1) 4                |
| <b>Adverse events by organ class</b>                          |                            |                              |                                       |                                         |                                                       |                                                         |                                                  |                                                   |                          |
| <b>Gastrointestinal disorders</b>                             | 1 (3.1) 1                  | 5 (15.6) 5                   | 1 (3.1) 2                             | 6 (18.8) 7                              | 5 (16.1) 7                                            | 15 (48.4) 24                                            | 15 (46.9) 50                                     | 23 (71.9) 81                                      | 24 (75.0) 96             |
| <b>Nervous system disorders</b>                               | 1 (3.1) 1                  | 1 (3.1) 1                    | 4 (12.5) 4                            | 0                                       | 2 (6.5) 2                                             | 2 (6.5) 4                                               | 9 (28.1) 16                                      | 10 (31.3) 22                                      | 14 (43.8) 28             |
| <b>Metabolism &amp; nutritional disorders</b>                 | 0                          | 0                            | 0                                     | 2 (6.3) 2                               | 0                                                     | 3 (9.7) 3                                               | 18 (56.3) 19                                     | 21 (65.6) 22                                      | 21 (65.6) 24             |
| <b>General disorders &amp; administration site conditions</b> | 1 (3.1) 1                  | 0                            | 1 (3.1) 1                             | 0                                       | 0                                                     | 3 (9.7) 4                                               | 6 (18.8) 9                                       | 8 (25.0) 13                                       | 8 (25.0) 15              |
| <b>Infections &amp; infestation</b>                           | 0                          | 0                            | 0                                     | 0                                       | 1 (3.2) 1                                             | 1 (3.2) 1                                               | 5 (15.6) 6                                       | 6 (18.8) 8                                        | 6 (18.8) 8               |
| <b>Eye disorders</b>                                          | 0                          | 0                            | 1 (3.1) 1                             | 0                                       | 0                                                     | 0                                                       | 1 (3.1) 1                                        | 1 (3.1) 1                                         | 2 (6.3) 2                |
| <b>Injury, poisoning &amp; procedural</b>                     | 1 (3.1) 1                  | 0                            | 1 (3.1) 1                             | 0                                       | 0                                                     | 0                                                       | 0                                                | 0                                                 | 2 (6.3) 2                |



**complications**

|                                                          |   |           |   |           |           |   |           |           |           |
|----------------------------------------------------------|---|-----------|---|-----------|-----------|---|-----------|-----------|-----------|
| <b>Psychiatric disorders</b>                             | 0 | 0         | 0 | 0         | 1 (3.2) 1 | 0 | 1 (3.1) 1 | 2 (6.3) 2 | 2 (6.3) 2 |
| <b>Respiratory, thoracic &amp; mediastinal disorders</b> | 0 | 0         | 0 | 0         | 1 (3.2) 1 | 0 | 1 (3.1) 1 | 2 (6.3) 2 | 2 (6.3) 2 |
| <b>Musculoskeletal &amp; connective tissue disorders</b> | 0 | 1 (3.1) 1 | 0 | 0         | 0         | 0 | 0         | 0         | 1 (3.1) 1 |
| <b>Skin &amp; subcutaneous tissue disorders</b>          | 0 | 0         | 0 | 1 (3.1) 1 | 0         | 0 | 0         | 0         | 1 (3.1) 1 |

---

*E* number of adverse events, *n* number of subjects with adverse event, *SNAC* sodium N-(8-[2-hydroxybenzoyl] amino) caprylate, % proportion of subjects having an adverse event
