# Supplementary material for: Effect of Oral Semaglutide on the Pharmacokinetics of Lisinopril, Warfarin, Digoxin, and Metformin in Healthy Subjects
Source: Springer Nature journal article supplement (doi:10.1007/s40262-019-00756-2), 2019-04-04
Supplement: MOESM2 [file 16609738]

## Supplementary material

**Journal name:** *Clinical Pharmacokinetics*

**Article title:** Effect of Oral Semaglutide on the Pharmacokinetics of Lisinopril, Warfarin, Digoxin, and Metformin in Healthy Subjects

**Author names:** Tine A. Bækdal, Jeanett Borregaard, Cilie W. Hansen, Mette Thomsen, Thomas W. Anderson

**Corresponding author details:** Tine A. Bækdal: Novo Nordisk A/S, Vandtårnsvej 108–110, 2860 Søborg, Denmark. Email: tabq@novonordisk.com

**Supplementary fig. 1** Mean systolic blood pressure in Trial 1 (a) and Trial 2 (b)

a.

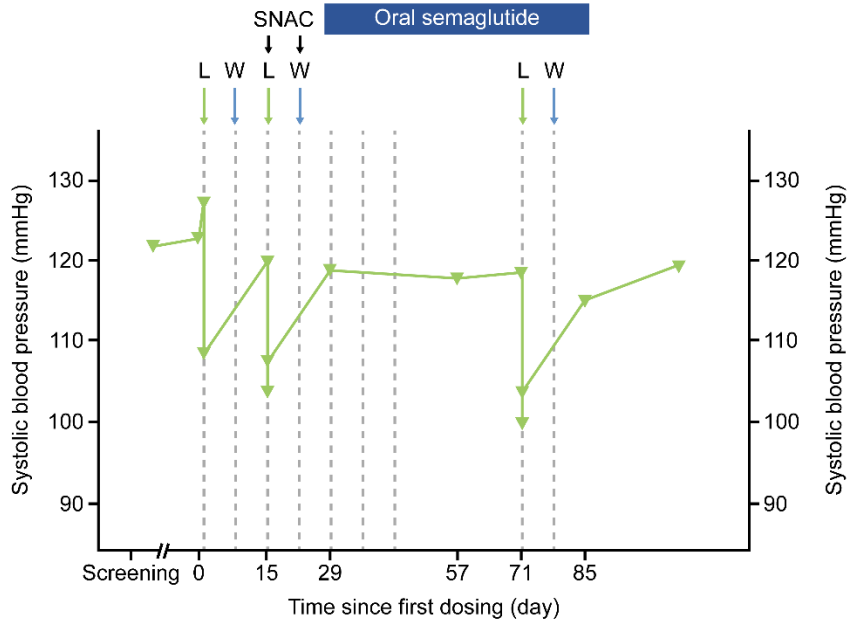

b.

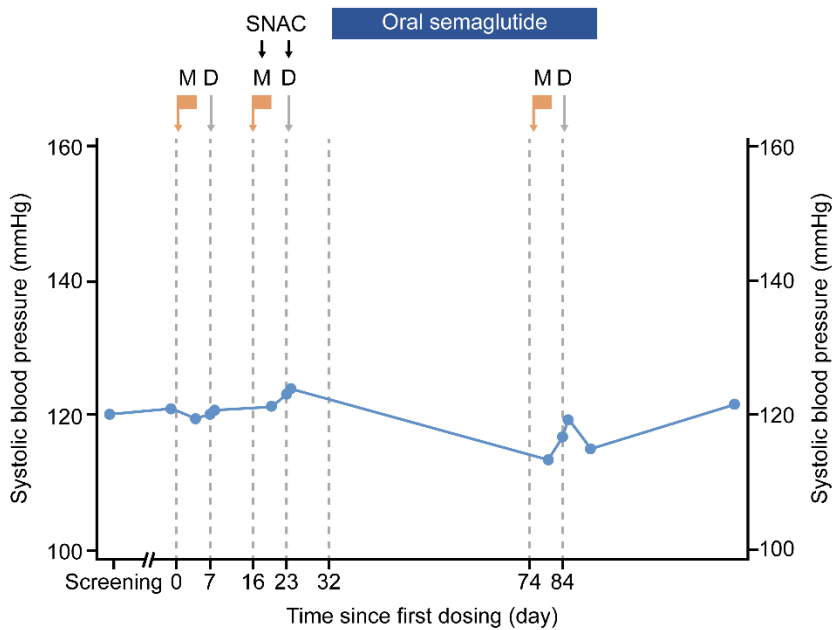

D digoxin, L lisinopril, M metformin, SN sodium N-(8-[2-hydroxybenzoyl] amino) caprylate, W warfarin

**Supplementary fig. 2** Mean body weight in Trial 1 (a) and Trial 2 (b)

a.

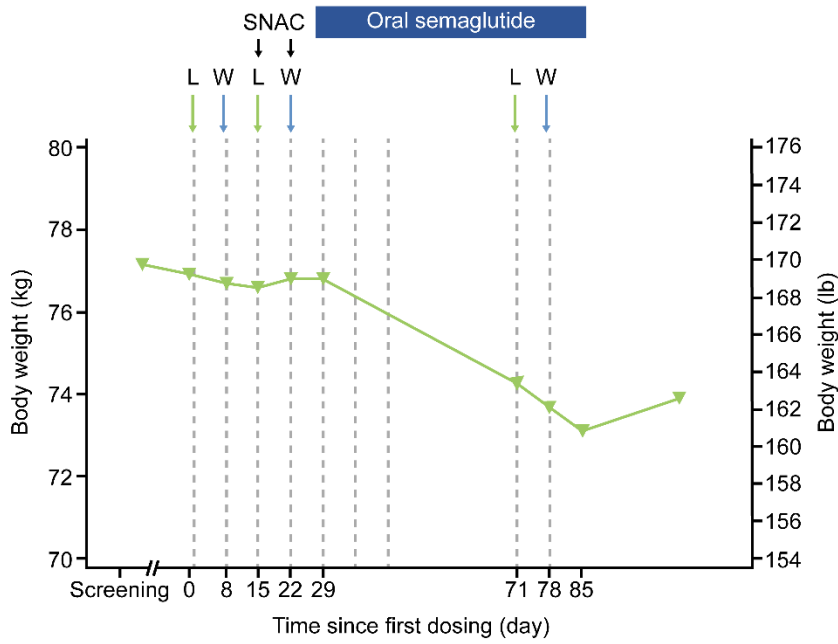

b.

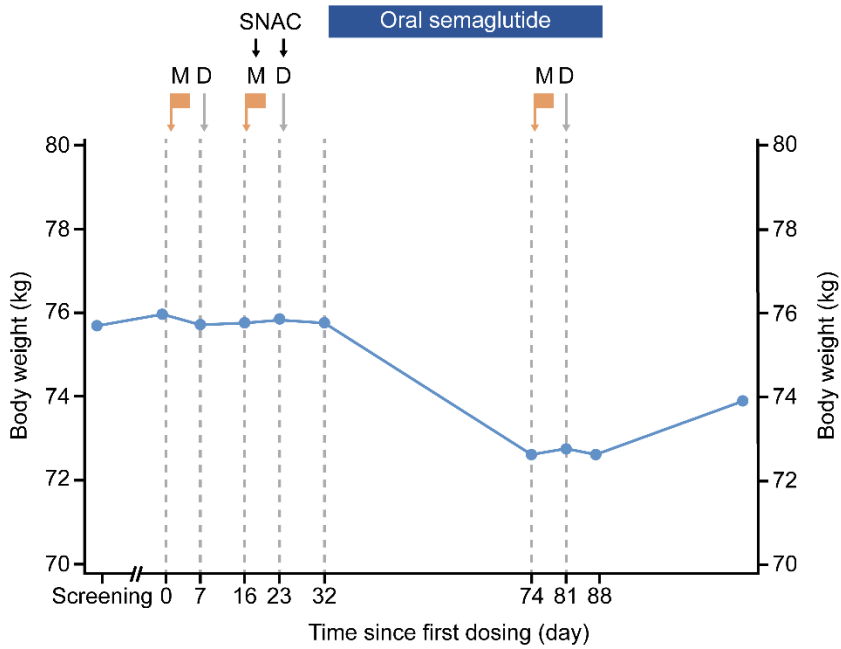

*D* digoxin, *L* lisinopril, *M* metformin, *SN* sodium N-(8-[2-hydroxybenzoyl] amino) caprylate, *W* warfarin
